# Supplementary material
Source: Elsevier journal article supplement (https://www.sciencedirect.com/science/article/pii/S188898912030032X)
Supplement: mmc1 [file S188898912030032X:mmc1.docx]

Material suplementario


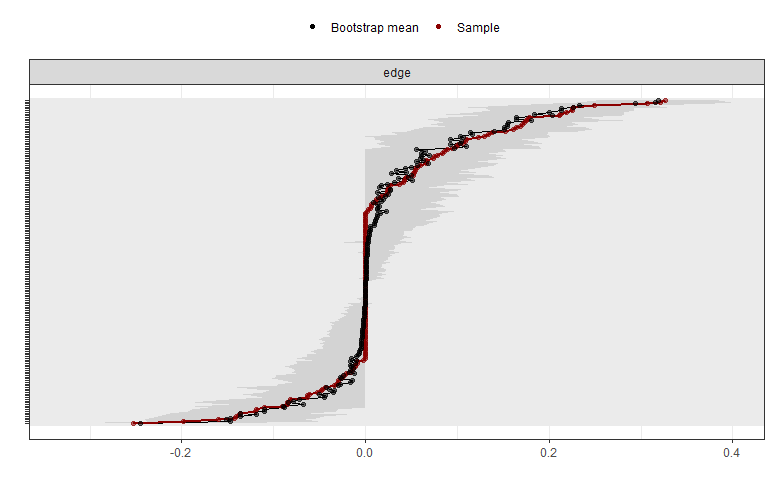


*Figura S1*. Precisión en la estimación de los pesos-*edges* (línea roja) y el intervalo confidencial al 95% de las estimaciones (línea gris) para la red de conducta suicida, factores de riesgo y protección.


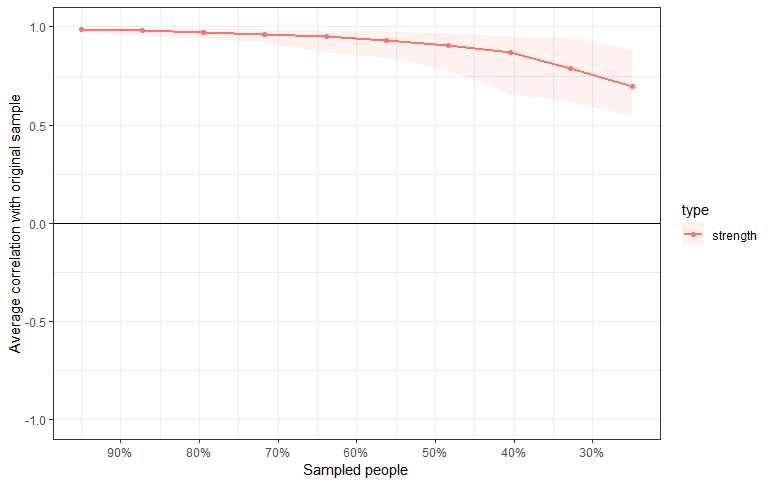


*Figura S2*. Estabilidad de los índices de centralidad para la red de conducta suicida, factores de riesgo y protección.
